# Supplementary material
Source: PubMed Central journal article supplement (PMC6785088)

## A Injection site

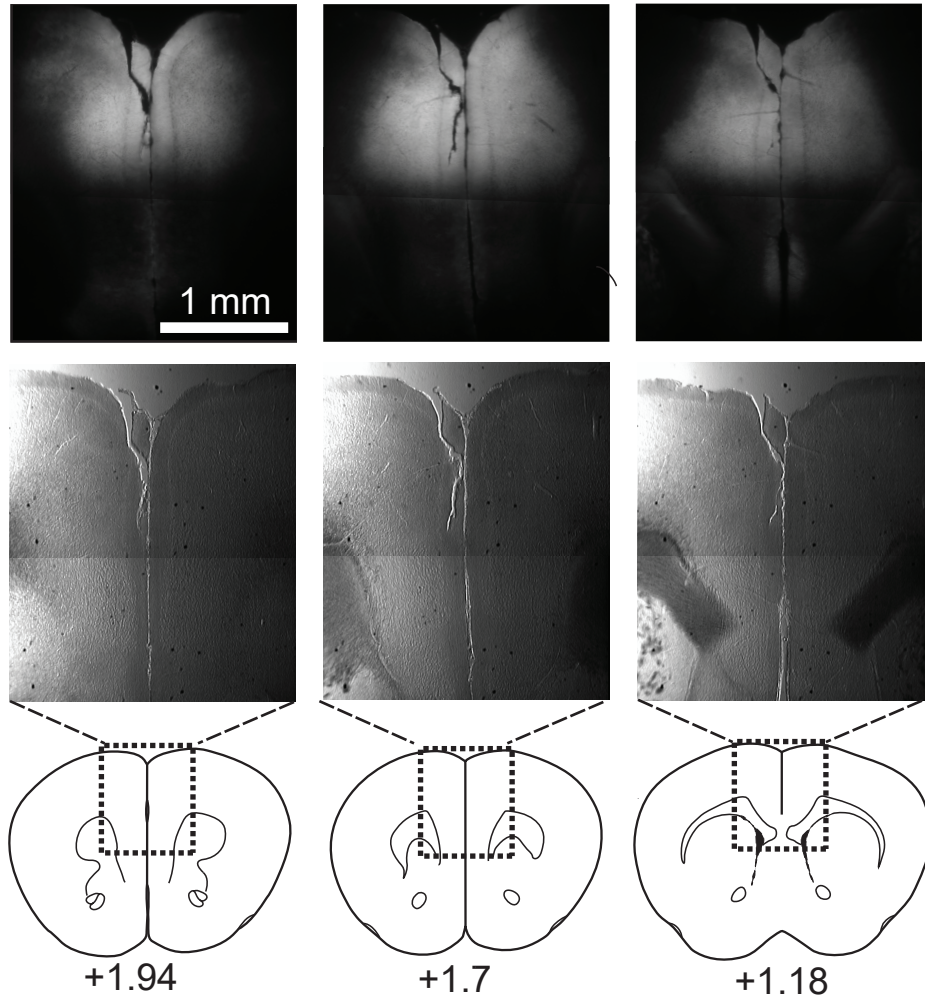

## B Recording site

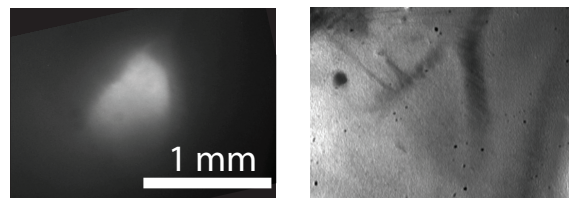

Figure S1

Supplement: 41386_2019_342_MOESM2_ESM.pdf [file 41386_2019_342_MOESM2_ESM.pdf]

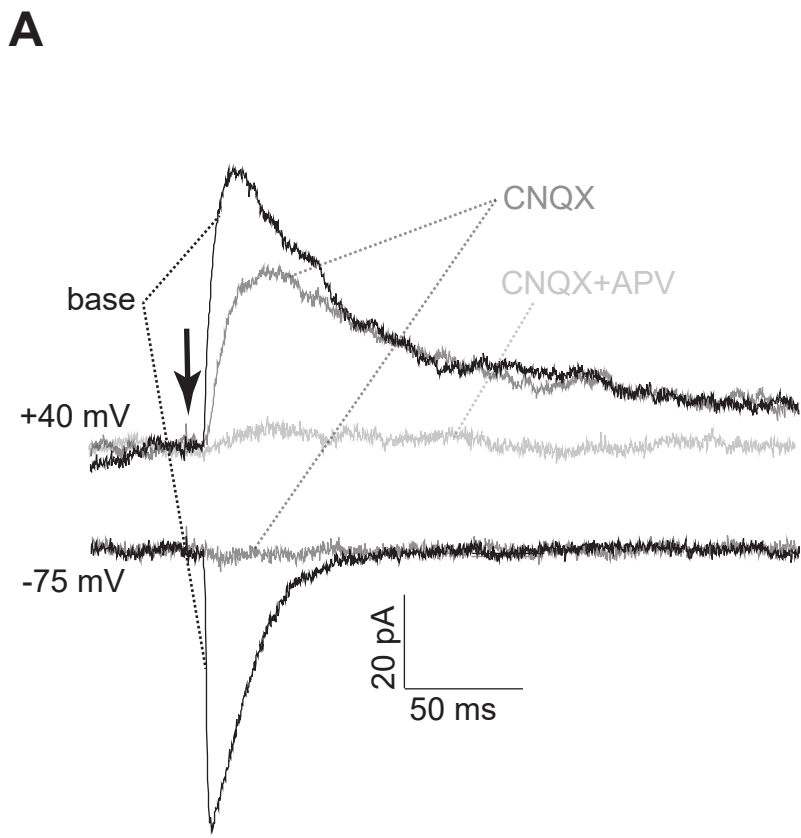

Figure S2

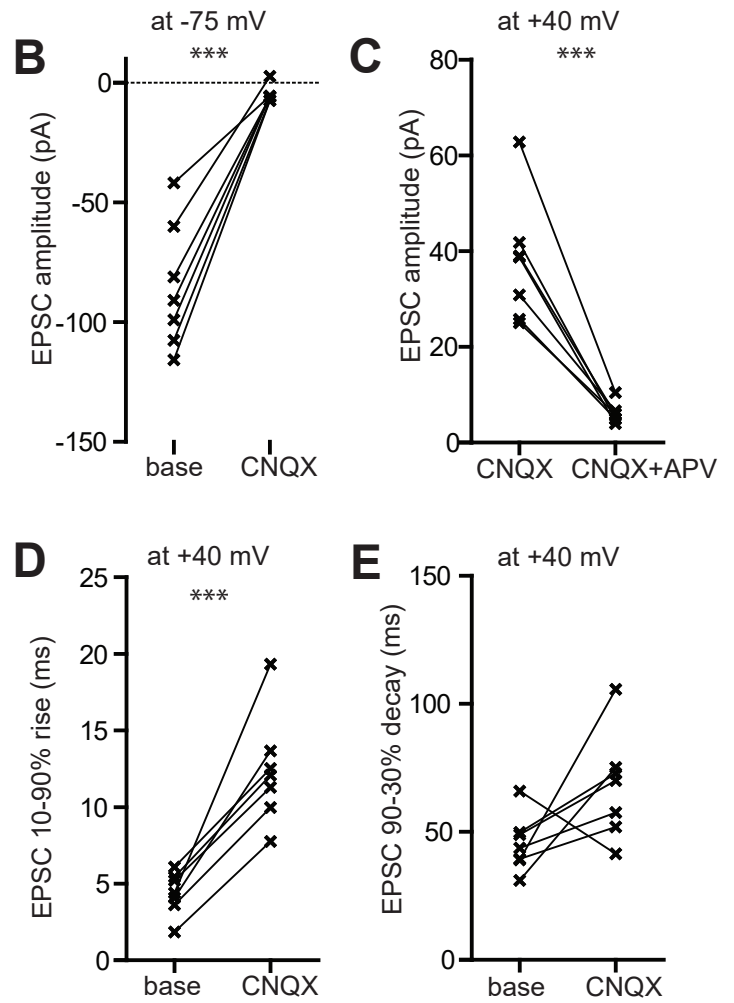

Supplement: 41386_2019_342_MOESM3_ESM.pdf [file 41386_2019_342_MOESM3_ESM.pdf]
